# Supplementary material for: Curcumin improves the therapeutic efficacy of Listeriaat-Mage-b vaccine in correlation with improved T-cell responses in blood of a triple-negative breast cancer model 4T1
Source: PubMed Central journal article supplement (PMC3799292; doi:10.1002/cam4.94), 2013-07-02

Figure S1

**Mann-Whitney**

Sal vs LM  $p=0.2222$

Sal vs LM-Mb  $p=0.0317$

Sal vs LM-Mb+Curc  $p=0.0079$

Sal vs Curc  $p=0.0496$

LM-Mb+Curc vs LM-Mb  $p=0.0162$

LM-Mb+Curc vs Curc  $p=0.0272$

$p < 0.05$  is significant

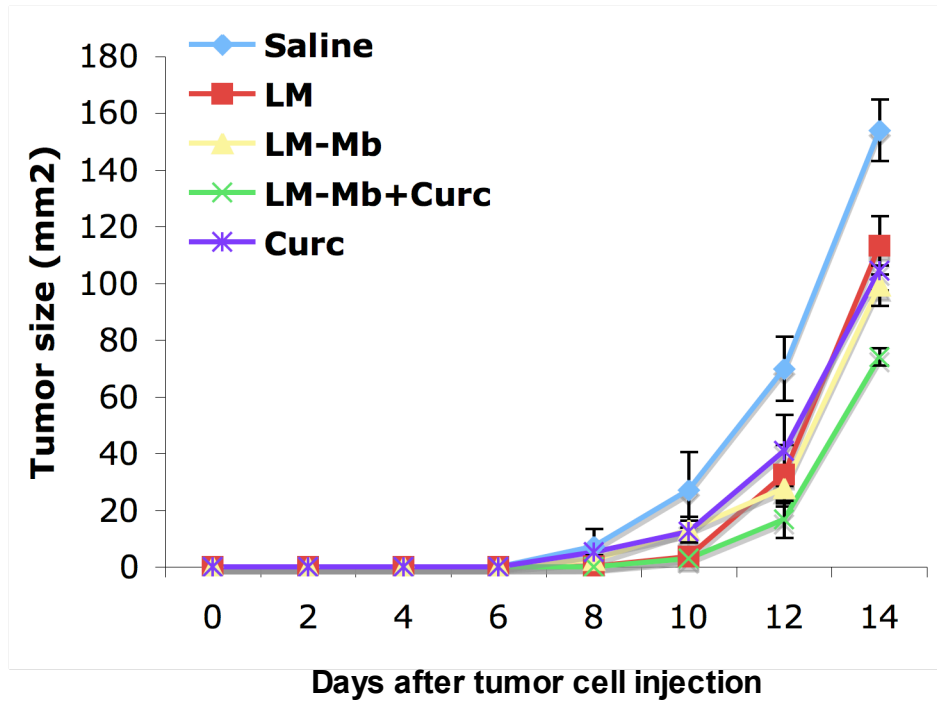

Supplement: cam40002-0571-SD1.pdf [file cam40002-0571-SD1.pdf]
