# Supplementary material for: Curcumin improves the therapeutic efficacy of Listeriaat-Mage-b vaccine in correlation with improved T-cell responses in blood of a triple-negative breast cancer model 4T1
Source: PubMed Central journal article supplement (PMC3799292; doi:10.1002/cam4.94), 2013-07-02

Figure S2

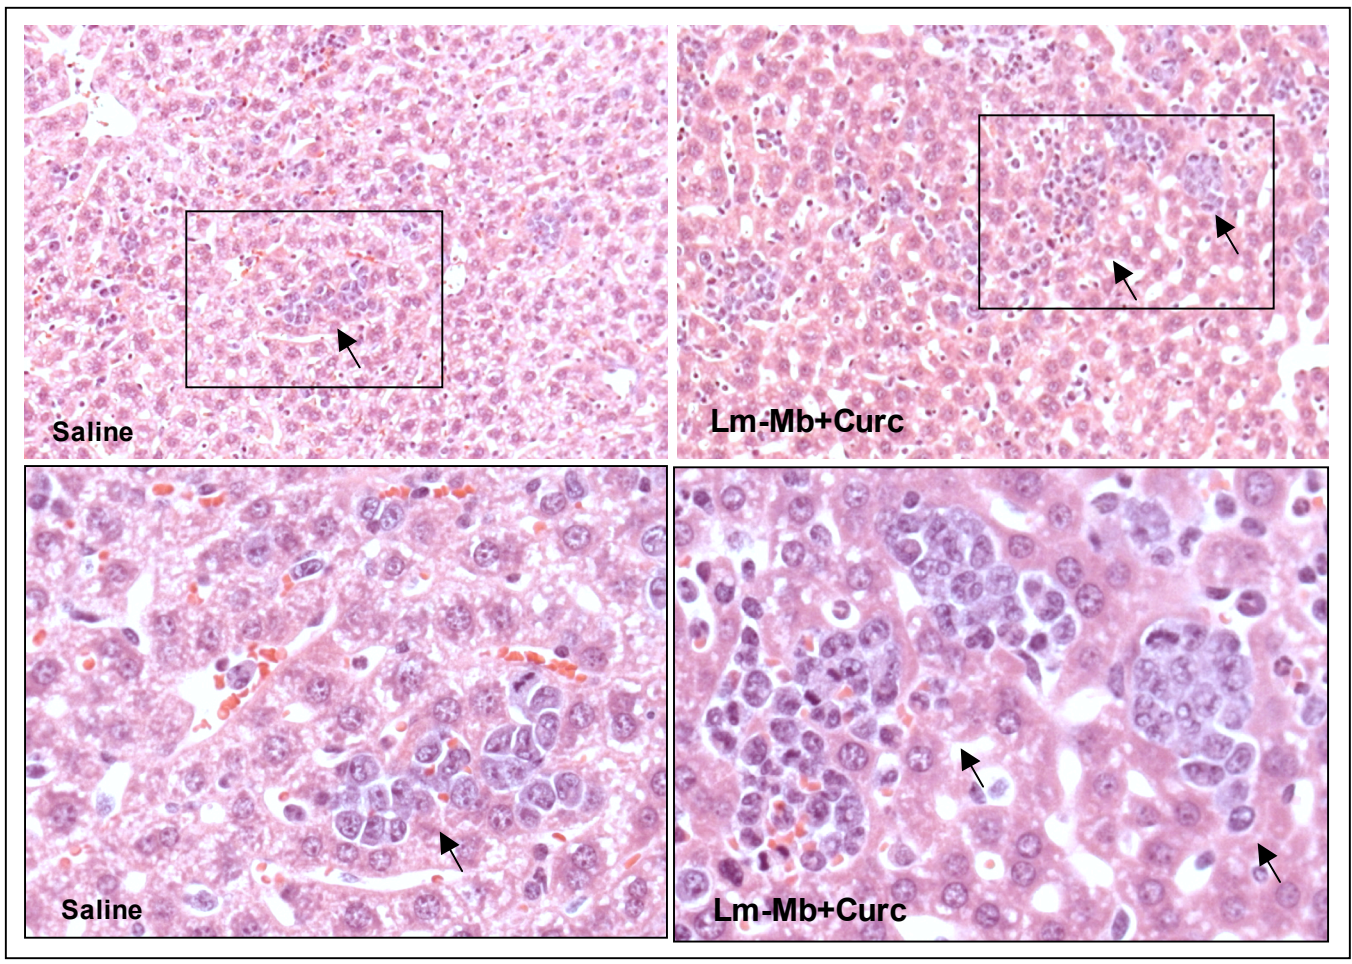

Supplement: cam40002-0571-SD2.pdf [file cam40002-0571-SD2.pdf]
