# Supplementary material for: Curcumin improves the therapeutic efficacy of Listeriaat-Mage-b vaccine in correlation with improved T-cell responses in blood of a triple-negative breast cancer model 4T1
Source: PubMed Central journal article supplement (PMC3799292; doi:10.1002/cam4.94), 2013-07-02
Supplement: cam40002-0571-SD4.pdf [file cam40002-0571-SD4.pdf]

**Table S1:** Histological examination of tissues after therapeutic treatment with *Listeria*<sup>at</sup>-Mage-b and curcumin

| Organ         | Mouse number |      |      |      |      | Mouse number |        |      |      |        |
|---------------|--------------|------|------|------|------|--------------|--------|------|------|--------|
|               | S1           | S2   | S3   | S4   | S5   | MC1          | MC2    | MC3  | MC4  | MC5    |
| <b>Kidney</b> | nsf          | nsf  | nsf  | nsf  | nsf  | nsf          | nsf    | nsf  | nsf  | nsf    |
| <b>Heart</b>  | nsf          | nsf  | nsf  | nsf  | nsf  | nsf          | nsf    | nsf  | nsf  | nsf    |
| <b>Lung</b>   | icn3         | icn1 | icn2 | icn3 | icn1 | icn3         | icn3   | icn1 | icn3 | icn3   |
| <b>Liver</b>  | cn0          | cn0  | cn0  | cn0  | cn0  | cn1          | cn0    | cn0  | cn0  | cn0    |
| <b>Liver</b>  | emh3         | emh0 | emh2 | emh3 | emh1 | emh4         | emh4   | emh1 | emh2 | emh3   |
| <b>Liver</b>  | ipp1         | ipp0 | ipp1 | ipp1 | ipp0 | ipp2         | ipp2   | ipp0 | ipp1 | ipp2   |
| <b>Liver</b>  | gmi1         | gmi0 | gmi1 | gmi1 | gmi1 | gmi2         | gmi3   | gmi0 | gmi1 | gmi0   |
| <b>Spleen</b> | imh2         | imh1 | imh2 | imh3 | imh1 | imh3-4       | imh3-4 | imh0 | imh4 | imh3-4 |

**Nsf**=no-significant finding, **icn**=increased circulating neutrophils, **cn**=coagulation necrosis, **emh**=extramedullary hematopoiesis, **ipp**=infiltrate, portal, mixed polymorphonuclear cells, **gmi**=granulomas, mixed inflammation, **imh**=increased myeloid extramedullary hematopoiesis  
The numbers after the abbreviations represents the grade. 0=no finding, 1=minimal finding, 2= mild finding, 3=moderate finding, 4=marked finding, 5=severe finding. S=saline, MC=*Listeria*<sup>at</sup>-Mage-b and curcumin.
